# Supplementary material for: Systematic assessment of the growth plates of the wrist in young gymnasts: development and validation of the Amsterdam MRI assessment of the Physis (AMPHYS) protocol
Source: PubMed Central journal article supplement — BMJ Open Sport Exerc Med. 2018 Apr 9;4(1):e000352. doi: 10.1136/bmjsem-2018-000352 (PMC5905740; doi:10.1136/bmjsem-2018-000352), 2018-04-09

**Appendix 1** – Systematic assessment of the growth plates of the wrist in young gymnasts: development and validation of the Amsterdam MRI assessment of the Physis (AMPHYS) protocol

L.S. Kox, R.B.J. Kraan, C.F. van Dijke, R. Hemke, S. Jens, M.C. de Jonge, E.H.G. Oei, F.F. Smithuis, M.P. Terra, M. Maas

**Appendix 1A.** MRI parameters

| Sequence                | PD TSE            | PD TSE SPAIR      | T2 Dixon         | 3D WATSc    |
|-------------------------|-------------------|-------------------|------------------|-------------|
| Plane                   | Coronal           | Coronal           | Coronal          | Coronal     |
| TR (ms)                 | 2000              | 2000              | 2500             | 20          |
| TE (ms)                 | 20                | 30                | (1) 70<br>(2) 71 | 5           |
| Flip angle (degrees)    | 90                | 90                | 90               | 15          |
| Slice thickness (mm)    | 2.5               | 2.5               | 2                | 0.75        |
| Field of view (mm)      | 100 × 88          | 100 × 88          | 100×100          | 120×120×45  |
| Matrix                  | 332 × 276         | 332 × 279         | 312×235          | 240×240     |
| Spatial resolution (mm) | 0.30 × 0.32 × 2.5 | 0.30 × 0.3 1× 2.5 | 0.32×0.43×2      | 0.5×0.5×1.5 |
| Scan time (minutes)     | 04:36             | 04:12             | 04:10            | 02:22       |

TR, repetition time; TE, echo time; PD, proton-density; TSE, turbo spin-echo; SPAIR, SPectral Attenuated Inversion Recovery

**Appendix 1B.** Field of view including the distal radius and ulna as well as the proximal physis of the first metacarpal bone

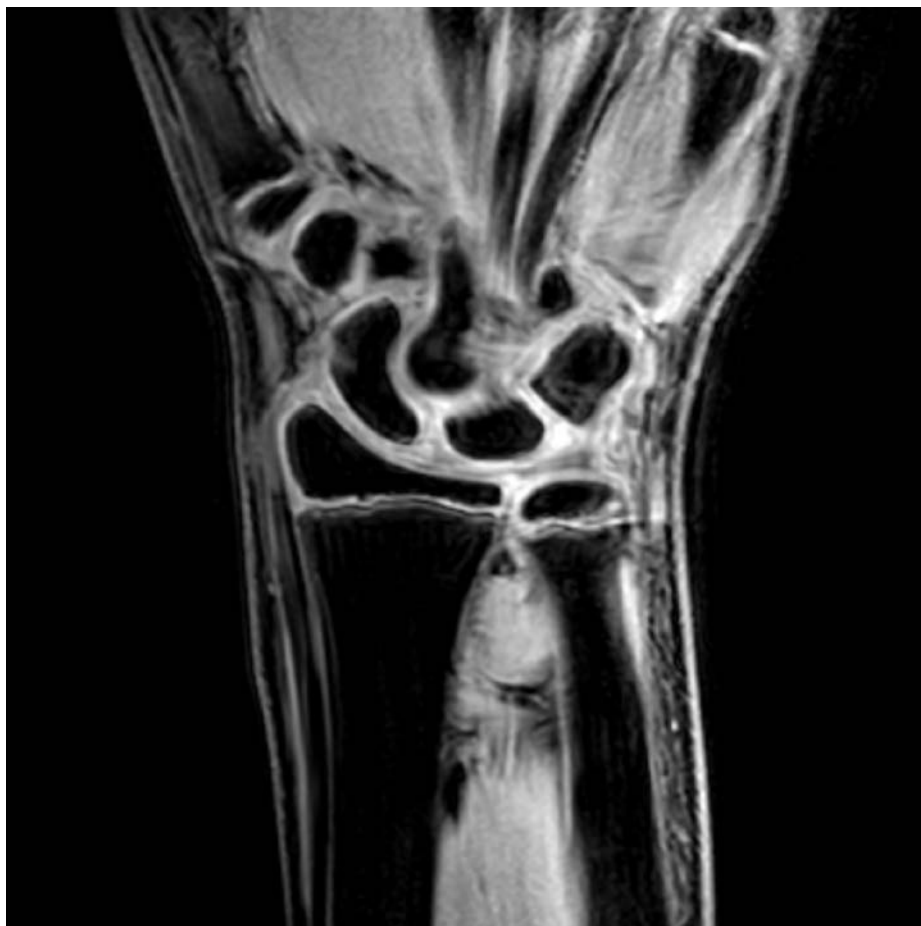

Supplement: bmjsem-2018-000352supp001.pdf [file bmjsem-2018-000352supp001.pdf]
