# Supplementary material for: Systematic assessment of the growth plates of the wrist in young gymnasts: development and validation of the Amsterdam MRI assessment of the Physis (AMPHYS) protocol
Source: PubMed Central journal article supplement — BMJ Open Sport Exerc Med. 2018 Apr 9;4(1):e000352. doi: 10.1136/bmjsem-2018-000352 (PMC5905740; doi:10.1136/bmjsem-2018-000352), 2018-04-09
Supplement: bmjsem-2018-000352supp003.pdf [file bmjsem-2018-000352supp003.pdf]

## Amsterdam MRI assessment of the Physis

## evaluation form

Observer name

Patient ID

Date

\_\_\_\_ / \_\_\_\_ / \_\_\_\_  
 dd / mmm / yyyy

### A. Epiphysis

#### Radius

GRADE 0 1 2 3 4 5

#### Bone marrow oedema

##### Extent

None / <50% / >50% of epiphyseal volume

##### Location

None / adjacent / not adjacent to physis

##### Signal intensity

None / 1 (minimal) / 2 / 3 / 4 / 5 (maximal)

##### Visibility on 3D WATSc

None / not visible / visible

### B. Physis

#### Radius

GRADE 0 1 2 3 4 5

#### Thickness

Normal / increased

#### Thickness compared to

##### proximal physis of first metacarpal

Not increased / 2x / 3x / 4x thicker

#### Signal intensity

Normal / 1 (slightly increased) / 2 / 3 / 4 (maximal)

### C. Metaphysis

#### Radius

GRADE 0 1 2 3 4 5

#### Ulna

0 1 2 3 4 5

#### Physeal border on metaphyseal side

Undulating / slightly irregular / distinctly irregular

#### Metaphyseal intrusions

Absent / present

#### Connection of intrusion with physis

None / connected / not connected with physis

#### Depth of intrusions

None / <2 mm / >2 mm

#### Bone marrow oedema

##### Signal intensity

None / 1 (minimal) / 2 / 3 / 4 / 5 (maximal)
